# Supplementary material for: Nogo-A antibody delivery through the olfactory mucosa mitigates experimental autoimmune encephalomyelitis in the mouse CNS
Source: PubMed Central journal article supplement (PMC10412545; doi:10.1038/s41420-023-01588-7), 2023-08-09

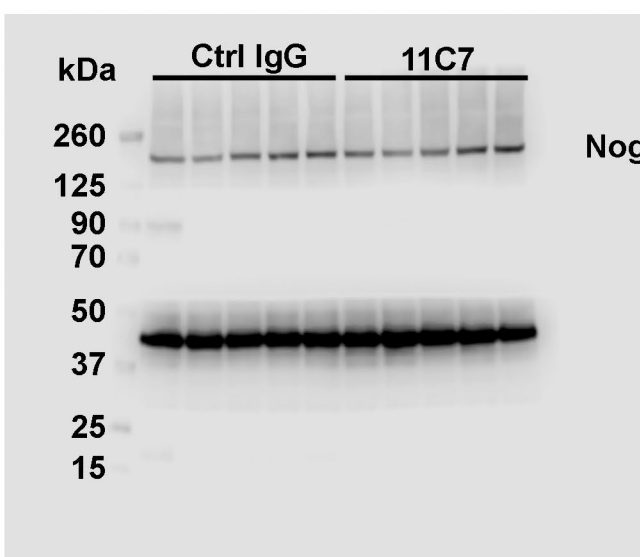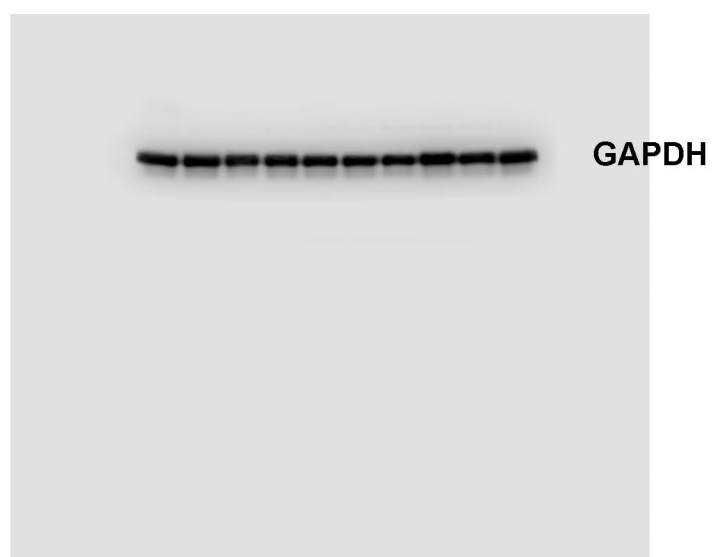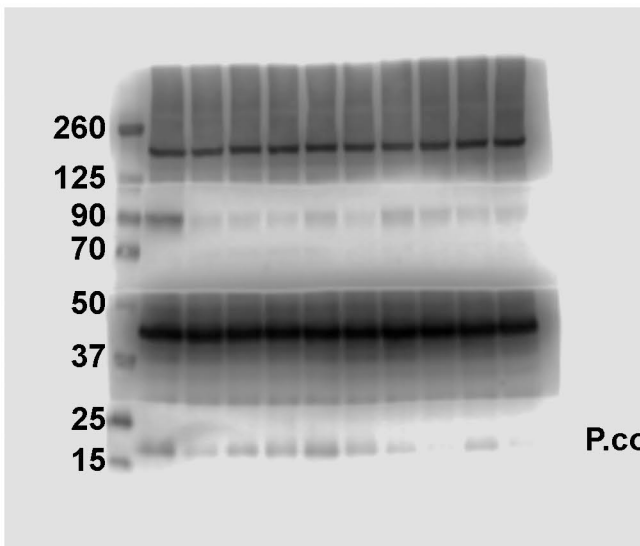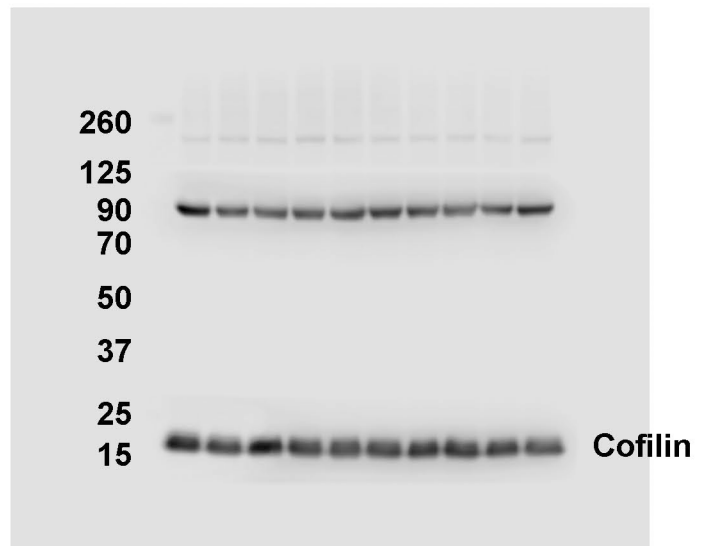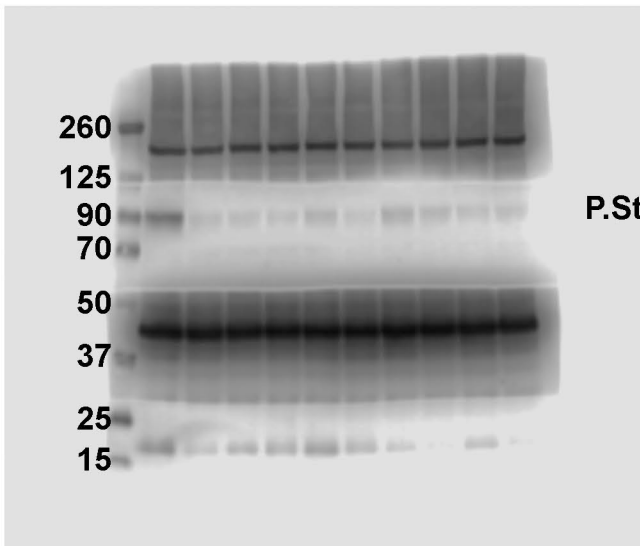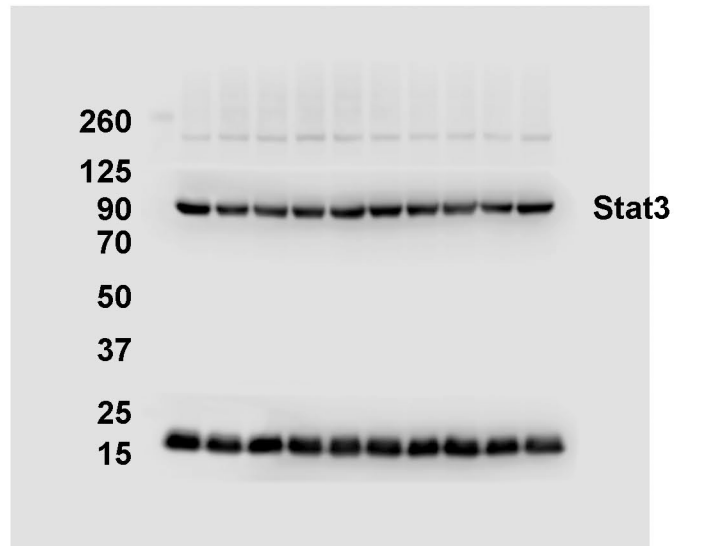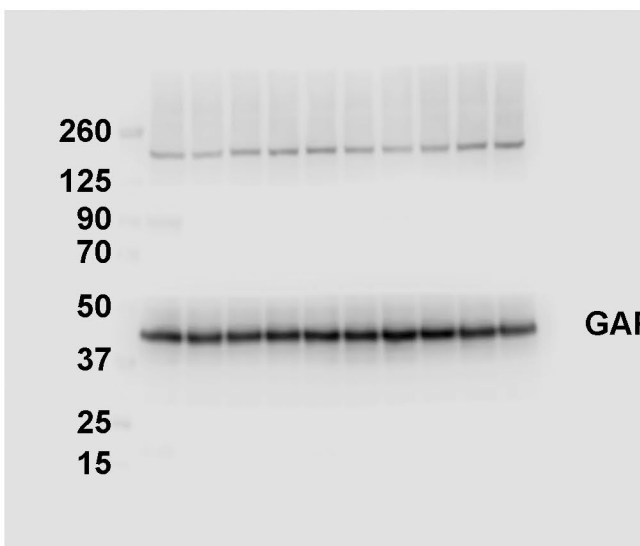

Supplement: 41420_2023_1588_MOESM5_ESM.pdf [file 41420_2023_1588_MOESM5_ESM.pdf]
